# Supplementary material for: Daptomycin treatment impacts resistance in off-target populations of vancomycin-resistant Enterococcus faecium
Source: PubMed Central journal article supplement (PMC7775125; doi:10.1371/journal.pbio.3000987), 2020-12-17

A

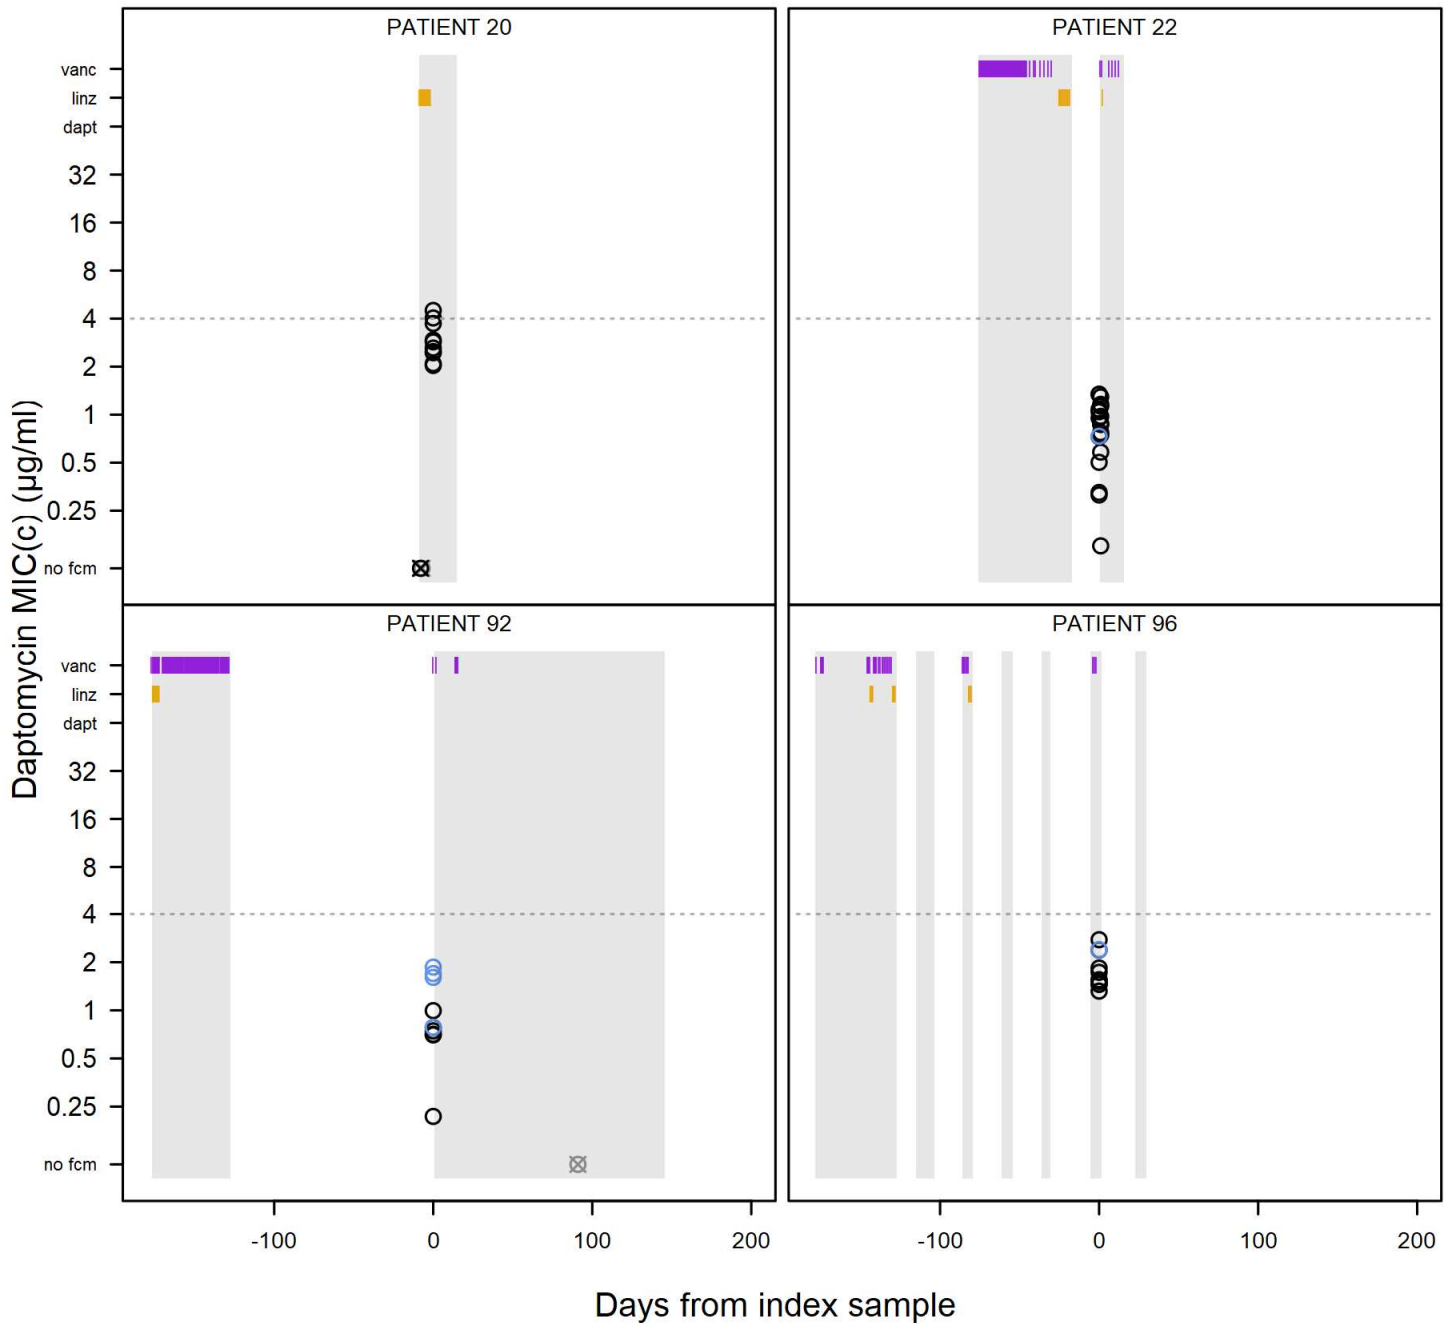

■ Admission    ■ Vancomycin    ■ Daptomycin    ■ Linezolid    ○ VR E. faecium    ○ VS E. faecium    ⊠ no E. faecium    ⊠ no Ent  
 ◆ VR E. faecium BSI    ◆ VS E. faecium BSI    ◆ VS E. faecalis BSI

**B**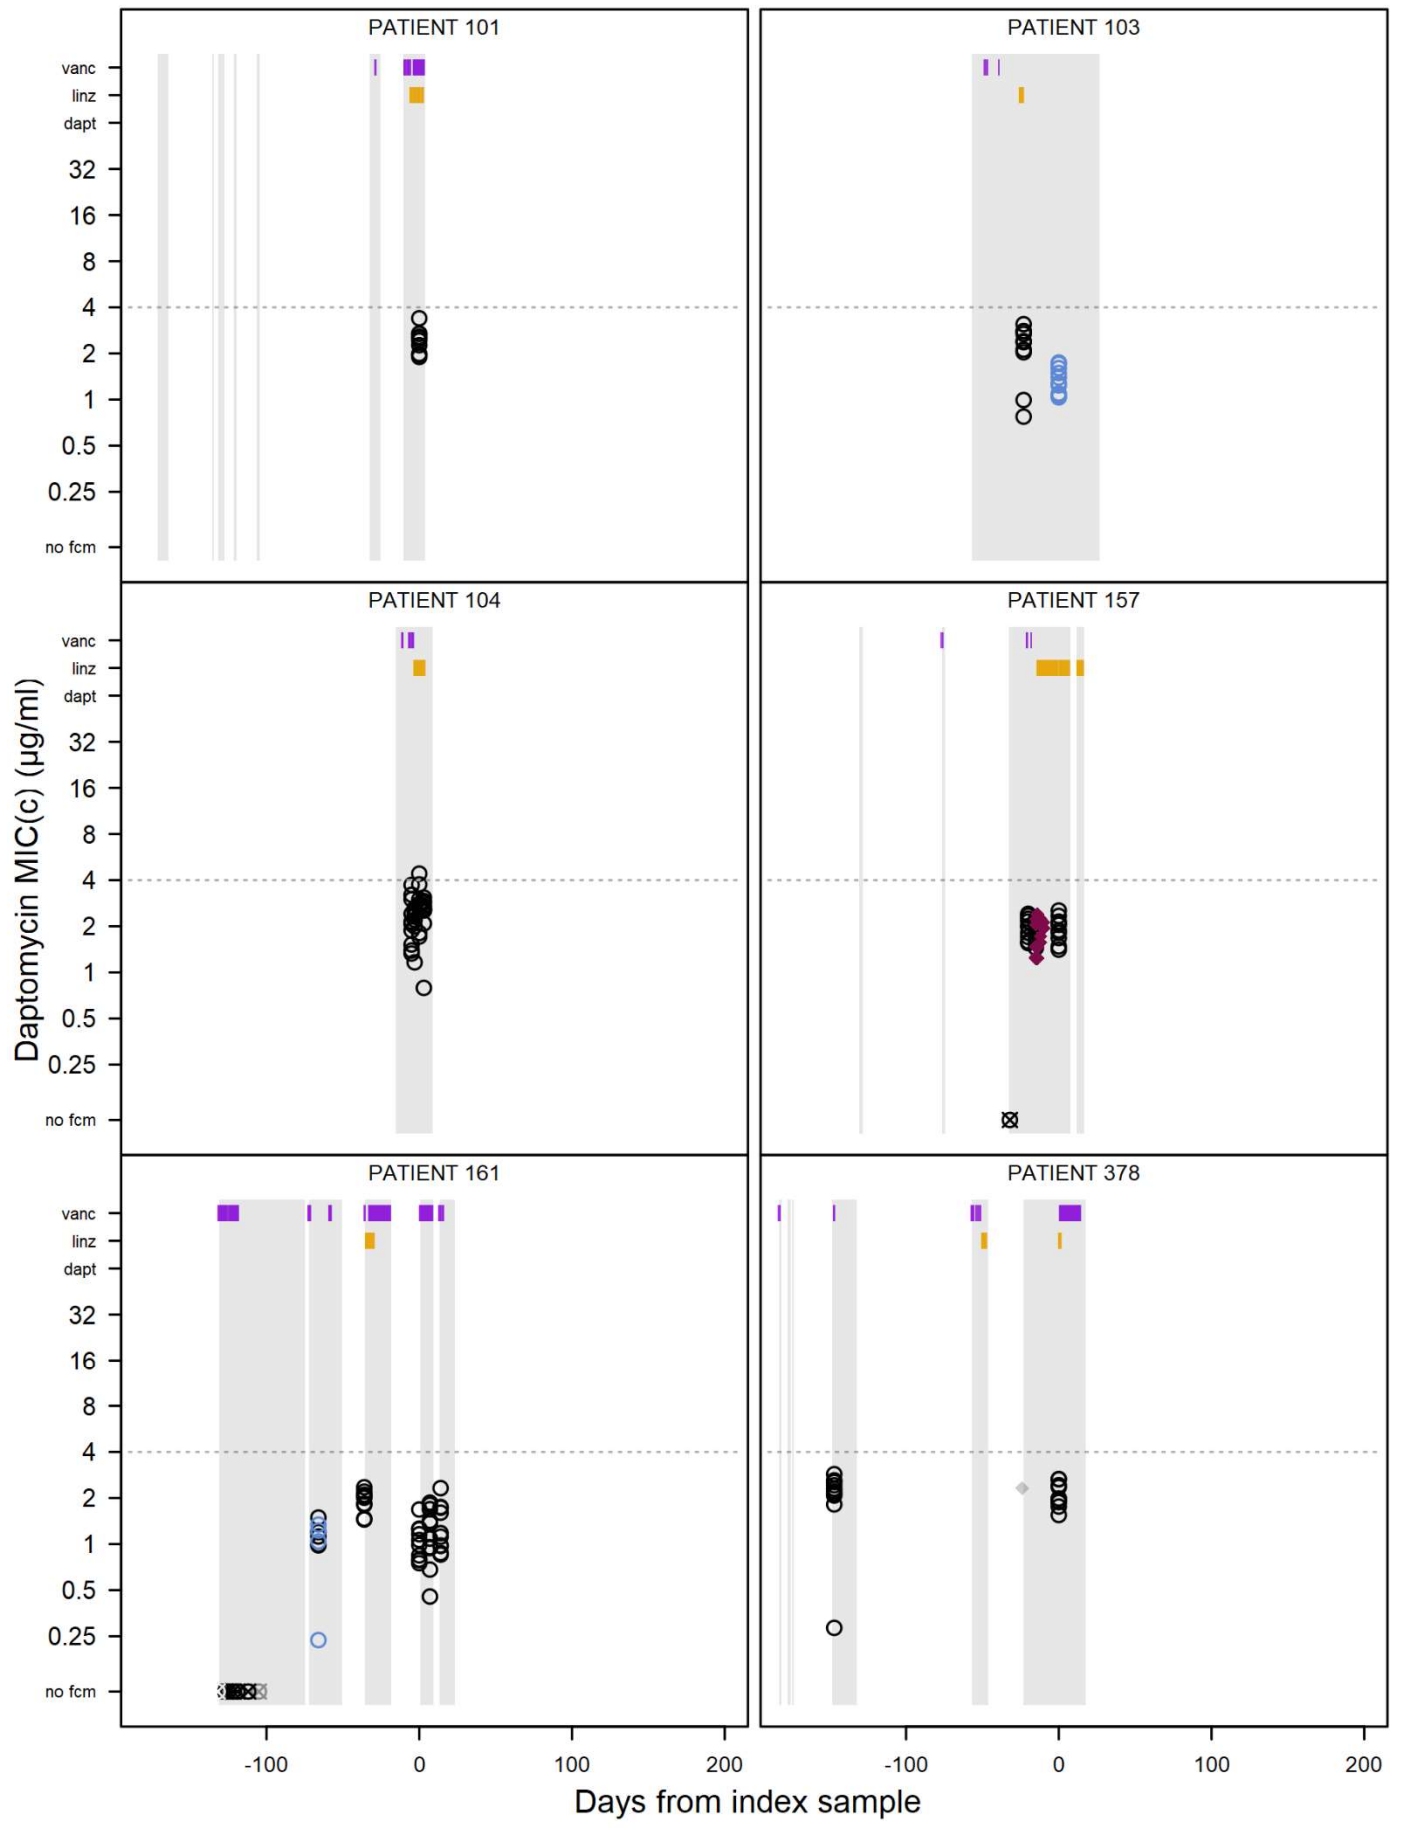



D

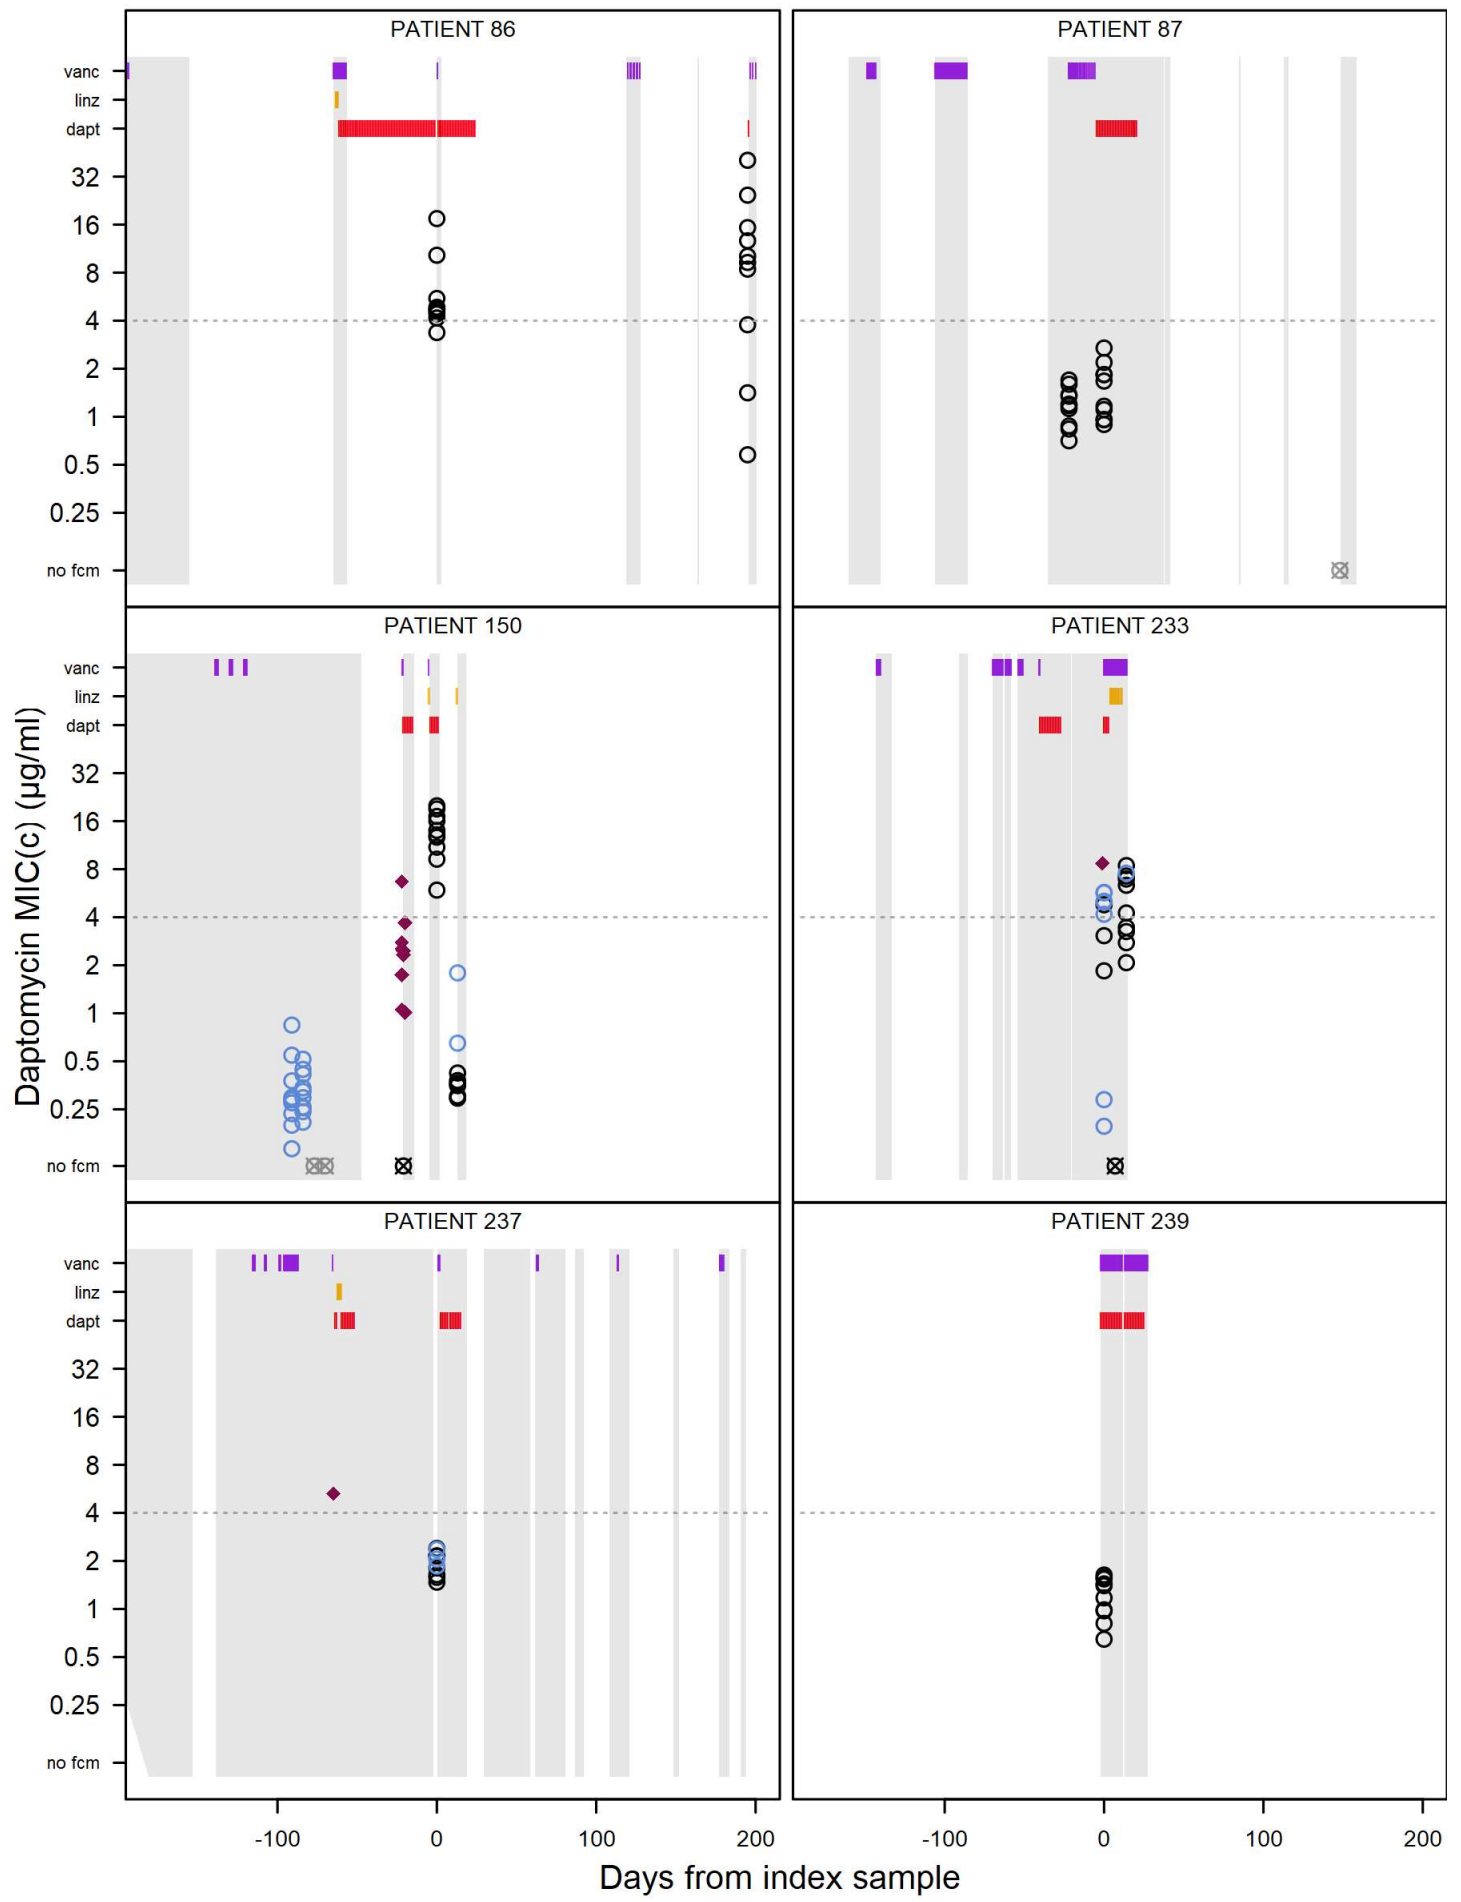

Supplement: pbio.3000987.s002.pdf [file pbio.3000987.s002.pdf]
