# Supplementary material for: Daptomycin treatment impacts resistance in off-target populations of vancomycin-resistant Enterococcus faecium
Source: PubMed Central journal article supplement (PMC7775125; doi:10.1371/journal.pbio.3000987), 2020-12-17
Supplement: pbio.3000987.s004.pdf [file pbio.3000987.s004.pdf]

S1 Table

**Numbers of doses of daptomycin in the 6 months prior to the index samples and the number of days between the most recent dose and the index sample.**

| Patient_ID | Days since last dose | Doses last 6 months | Mean MIC <sub>C</sub> |
|------------|----------------------|---------------------|-----------------------|
| PID00004   | 0.32                 | 12                  | 2.38                  |
| PID00029   | 6.76                 | 3                   | 1.77                  |
| PID00032   | 0.86                 | 4                   | 3.10                  |
| PID00054   | 141.33               | 3                   | 1.77                  |
| PID00064   | 60.93                | 11                  | 2.59                  |
| PID00084   | 36.85                | 34                  | 0.78                  |
| PID00086   | 56.77                | 6                   | 5.03                  |
| PID00087   | 0.81                 | 4                   | 1.29                  |
| PID00150   | 0.06                 | 12                  | 7.43                  |
| PID00233   | 27.32                | 14                  | 2.85                  |
| PID00237   | 51.90                | 11                  | 1.77                  |
| PID00239   | 0.11                 | 3                   | 1.09                  |
